# Supplementary material for: Effect of Violet Light-Transmitting Eyeglasses on Axial Elongation in Myopic Children: A Randomized Controlled Trial
Source: MDPI journal article supplement (doi:10.3390/jcm10225462), 2021-11-22
Supplement: s1 [file s1]

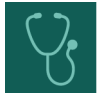

**Table S1.** Details of the reasons for withdrawn and protocol deviation.

| Subject            | 113 cases (male:43 cases, female:70 cases)                                                                         |                       |
|--------------------|--------------------------------------------------------------------------------------------------------------------|-----------------------|
| Withdrawn          | 10 cases                                                                                                           |                       |
|                    | subjects' issue                                                                                                    | 9                     |
|                    | family issue                                                                                                       | 1                     |
| Protocol deviation | 22 cases                                                                                                           | including duplication |
|                    | not satisfying inclusion criteria 3) those whose cycloplegic refraction in each eye is between -1.50 D and -4.50 D | 11                    |
|                    | not satisfying inclusion criteria 4) those who have one or two parent/s with myopia                                | 5                     |
|                    | not satisfying inclusion criteria 2) those who spend outdoor at least 1 hour a day                                 | 5                     |
|                    | subjects who simultaneously used other myopia correction                                                           | 4                     |

**Table S2.** Safety.

| Subject           | 113 cases (male:43 cases, female:70 cases) |   |
|-------------------|--------------------------------------------|---|
| Adverse reactions | 0 case                                     |   |
| Adverse events    | 1 case (Not Related)                       |   |
|                   | Influenza infection                        | 1 |

**Table S3.** Factors for increase in axial length of 1.2 mm or more.

|                                        | Univariate logistic regression |        |         |         | Multivariable logistic regression |        |         |         |
|----------------------------------------|--------------------------------|--------|---------|---------|-----------------------------------|--------|---------|---------|
|                                        | OR1                            | 95% CI |         | P-value | OR2                               | 95% CI |         | P-value |
| Age (y)                                | 0.28                           | 0.16   | , 0.51  | <0.0001 |                                   |        |         |         |
| Female                                 | 0.56                           | 0.19   | , 1.60  | 0.279   | 0.73                              | 0.24   | , 2.21  | 0.573   |
| Already wearing glasses at first visit | 4.67                           | 1.28   | , 17.06 | 0.020   | 4.23                              | 1.13   | , 15.78 | 0.032   |
| Parental myopia                        |                                |        |         |         |                                   |        |         |         |
| only father                            | 1.00                           |        | ref     |         | 1.00                              |        | ref     |         |
| only mother                            | 0.00                           | 0.00   | ,       | 0.997   |                                   |        |         |         |
| both parents                           | 0.17                           | 0.05   | , 0.55  | 0.003   | 0.47                              | 0.15   | , 1.48  | 0.198   |

OR: odds ratio; 95% CI: 95% confidence interval; ref: reference standard; BMI: body mass index; OR1: non-adjusted, OR2: adjusted by gender, already wearing glasses at first visit and parental myopia.

**Table S4.** Factors for decrease in spherical equivalent power of -2.5 D or less.

|                                        | Univariate logistic regression |        |         |         | Multivariable logistic regression |        |         |         |
|----------------------------------------|--------------------------------|--------|---------|---------|-----------------------------------|--------|---------|---------|
|                                        | OR1                            | 95% CI |         | P-value | OR2                               | 95% CI |         | P-value |
| Age (y)                                | 0.47                           | 0.31   | , 0.72  | 0.0004  |                                   |        |         |         |
| Female                                 | 0.85                           | 0.30   | , 2.37  | 0.750   | 0.95                              | 0.33   | , 2.72  | 0.921   |
| Already wearing glasses at first visit | 3.47                           | 1.08   | , 11.13 | 0.037   | 3.55                              | 1.09   | , 11.49 | 0.035   |
| Parental myopia                        |                                |        |         |         |                                   |        |         |         |
| only father                            | 1.00                           |        | ref     |         | 1.00                              |        | ref     |         |
| only mother                            | 0.28                           | 0.07   | , 1.15  | 0.077   |                                   |        |         |         |
| both parents                           | 0.28                           | 0.09   | , 0.90  | 0.033   | 0.51                              | 0.17   | , 1.47  | 0.210   |

OR: odds ratio; 95% CI: 95% confidence interval; ref: reference standard; BMI: body mass index; OR1: non-adjusted, OR2: adjusted by gender, already wearing glasses at first visit and parental myopia.
